# Supplementary material
Source: Hindawi journal article supplement (doi:10.1155/2012/723293)
Supplement: f1 [file 723293.f1.pdf]

**Table 1** List of probable antagonistic bacteria isolated from rhizosphere of various crops and tested for antagonistic activity against soft rot bacteria of potato

| Isolates No. | Sources (Rhizosphere) | Locations | Colony Characters on YPDA | Antagonistic activity |
|--------------|-----------------------|-----------|---------------------------|-----------------------|
| R-1          | Papaya                | Rangpur   | Yellow                    | -                     |
| R-2          | „                     | „         | Creamy white              | -                     |
| R-3          | Rice                  | „         | White                     | -                     |
| R-4          | „                     | „         | Creamy white              | -                     |
| R-5          | „                     | „         | White                     | -                     |
| R-6          | Potato                | „         | White dry                 | -                     |
| R-7          | „                     | „         | „                         | -                     |
| R-8          | „                     | „         | White sticky              | -                     |
| R-9          | „                     | „         | White                     | -                     |
| R-10         | „                     | „         | „                         | -                     |
| R-11         | „                     | „         | Creamy white sticky       | -                     |
| R-12         | „                     | „         | Very small white          | -                     |
| R-13         | „                     | „         | White                     | -                     |
| R-14         | „                     | BSMRAU    | White big                 | -                     |
| R-15         | „                     | „         | White                     | -                     |
| R-16         | „                     | „         | White sticky              | -                     |
| R-17         | „                     | BARI      | Yellow white              | -                     |
| R-18         | „                     | „         | White smal                | -                     |
| R-19         | „                     | „         | White big                 | -                     |
| R-20         | Tomato                | „         | White                     | -                     |
| R-21         | „                     | „         | Yellow                    | -                     |
| R-22         | „                     | „         | Creamy white              | -                     |
| R-23         | Onion                 | „         | White big                 | -                     |
| R-24         | „                     | BSMRAU    | White                     | -                     |
| R-25         | Garlic                | BARI      | White big                 | -                     |
| R-26         | Zinger                | „         | White                     | -                     |
| R-27         | Turmeric              | „         | White big                 | -                     |
| R-31         | Tomato                | BSMRAU    | White big                 | -                     |

BARI= Bangladesh Agricultural Research Institute

**Table 2** List of probable antagonistic bacteria isolated from endophytes of various crops and tested for antagonistic activity against soft rot bacteria of potato

| Isolates No. | Sources/(Endophytes of) | Locations | Colony Characters on YPDA | Antagonistic activity |
|--------------|-------------------------|-----------|---------------------------|-----------------------|
| E-35         | Cheerota                | BSMRAU    | White                     | -                     |
| E-36         | „                       | „         | Creamy white              | -                     |
| E-37         | Gada/Marigold           | „         | White                     | -                     |
| E-38         | „                       | „         | Creamy White              | -                     |
| E-39         | K. begun                | „         | Yellowish White           | -                     |
| E-40         | G. kumari               | „         | Creamy White              | -                     |
| E-41         | „                       | „         | Yellow                    | -                     |
| E-42         | „                       | „         | White                     | -                     |
| E-43         | Kachu/Taro              | „         | Yellow                    | -                     |
| E-44         | Tomato                  | „         | Yellow White              | -                     |
| <b>E-45</b>  | Papaya                  | „         | White small               | +                     |
| E-46         | Onion                   | „         | Yellow                    | -                     |
| E-47         | „                       | „         | White                     | -                     |
| E-48         | Garlic                  | „         | Creamy White              | -                     |
| E-49         | „                       | „         | Yellowish White           | -                     |
| E-50         | Bilimbi                 | „         | Very small White          | -                     |
| E-51         | Onion                   | Pabna     | White                     | -                     |
| E-52         | „                       | „         | White                     | -                     |
| E-53         | „                       | „         | White                     | -                     |
| E-54         | „                       | „         | White                     | -                     |
| E-55         | Potato                  | Rangpur   | White big                 | -                     |
| E-56         | „                       | „         | White big                 | -                     |
| E-57         | „                       | „         | Creamy White              | -                     |
| E-62         | Balsam                  | „         | Very small White          | -                     |
| E-63         | Olkachu/Elephant foot   | „         | Creamy White              | -                     |
| E-64         | Tomato                  | „         | Creamy White              | -                     |
| <b>E-65</b>  | Potato                  | Gazipur   | White                     | +                     |
| E-66         | „                       | „         | White                     | -                     |
| E-67         | „                       | „         | Creamy White              | -                     |
| E-68         | „                       | „         | White                     | -                     |
| E-69         | „                       | „         | White small               | -                     |
| E-70         | „                       | „         | „                         | -                     |
| E-71         | „                       | „         | „                         | -                     |
| E-72         | Indian onion            | „         | White                     | -                     |
| E-73         | „                       | „         | White                     | -                     |
| E-74         | „                       | „         | White sticky              | -                     |
| E-75         | „                       | „         | White small               | -                     |
| E-76         | „                       | „         | „                         | -                     |
| E-77         | „                       | „         | White dry                 | -                     |
| E-78         | Deshi onion             | BARI      | White                     | -                     |
| E-79         | Potato                  | Dhaka     | White                     | -                     |
| E-80         | „                       | „         | White small               | -                     |
| E-81         | „                       | „         | White                     | -                     |
| E-82         | „                       | „         | White                     | -                     |

**Table 3** List of probable antagonistic bacteria isolated from compost fertilizer, atmosphere and Laboratory of BSMRAU and tested for antagonistic activity against soft rot bacteria of potato

| Isolates No. | Sources      | Locations         | Colony Characters on YPDA | Antagonistic activity |
|--------------|--------------|-------------------|---------------------------|-----------------------|
| C-28         | Compost      | BARI              | White                     | -                     |
| C-29         | „            | „                 | White big                 | -                     |
| C-30         | „            | „                 | White                     | -                     |
| C-31         | „            | BSMRAU            | White big                 | -                     |
| A-59         | Air trapping | „                 | Redish                    | -                     |
| A-60         | „            | „                 | Creamy white              | -                     |
| A-61         | „            | „                 | White dry                 | -                     |
| L-85         | Lab isolate  | Microbiology lab. | White big                 | -                     |
| L-86         | „            | „                 | Yellow big                | -                     |
| L-87         | „            | „                 | White big                 | -                     |
| L-88         | „            | „                 | White                     | -                     |
| L-89         | „            | „                 | „                         | -                     |
| L-90         | „            | „                 | „                         | -                     |
| L-91         | „            | „                 | White big                 | -                     |
| L-92         | „            | „                 | „                         | -                     |
| L-93         | „            | „                 | Very small white          | -                     |
| L-94         | „            | „                 | White big                 | -                     |
| L-95         | „            | „                 | „                         | -                     |
| L-96         | „            | „                 | White big                 | -                     |

**Table 4** Physiological and biochemical characteristics of antagonistic bacteria E-45 and E-65

| Name of Tests              | Antagonistic isolates |      | * <i>Bacillus</i> sp. | * <i>Lactobacillus</i> sp. |
|----------------------------|-----------------------|------|-----------------------|----------------------------|
|                            | E-45                  | E-65 |                       |                            |
| Potato soft rot            | -                     | -    | -                     | -                          |
| Gram reaction              | +                     | +    | +                     | +                          |
| Growth at 37 °C            | w+                    | w+   | +                     | +                          |
| Growth in 6.5% NaCl        | w+                    | +    | +                     | NA                         |
| Catalase                   | -                     | -    | -                     | -                          |
| Oxidase                    | d+                    | -    | -                     | -                          |
| Nitrate reduction          | +                     | w+   | +                     | +                          |
| Arginine utilization       | -                     | -    | NA                    | NA                         |
| Gas formation              | w+                    | -    | -                     | w+                         |
| Fluorescent pigment on K'B | -                     | -    | -                     | -                          |
| Tobacco hypersensitivity   | -                     | -    | -                     | -                          |

\*=According to Kreigh and Holt 1984 (Bergey's manual) and Long *et al.* (2003);  
 + = growth positive; - = negative; d+=delay positive; d= doubtful; w+= weak growth; NA= Not available

**Table 5** Utilization of different sugar as source of carbon by antagonistic bacteria E-45 and E-65

| Name of carbon sources | Antagonistic isolates |      | * <i>Bacillus</i> sp. | * <i>Lactobacillus</i> sp. |
|------------------------|-----------------------|------|-----------------------|----------------------------|
|                        | E-45                  | E-65 |                       |                            |
| Cellubiose             | +                     | -    | +/-                   | NA                         |
| Lactose                | -                     | -    | +/-                   | NA                         |
| Maltose                | +                     | -    | +/-                   | NA                         |
| L-Arabinose            | +                     | -    | -                     | +                          |
| D-Galactose            | +                     | -    | -                     | +                          |
| D-Xylose               | +                     | -    | +/-                   | NA                         |
| Raffinose              | +                     | -    | +/-                   | NA                         |
| Sucrose                | +                     | -    | +/-                   | NA                         |
| Trehalose              | +                     | -    | +/-                   | NA                         |

\*=According to Kreigh and Holt 1984 (Bergey's manual) and Long *et al.* (2003)  
 + = growth positive; - = negative; d+=delay positive; NA= Not available

**Table 6** Utilization of different alcohols and organic acids by antagonistic bacteria E-45 and E-65

| Name of carbon sources | Antagonistic isolates |      | * <i>Bacillus</i> sp. | * <i>Lactobacillus</i> sp. |
|------------------------|-----------------------|------|-----------------------|----------------------------|
|                        | E-45                  | E-65 |                       |                            |
| Dulcitol               | d+                    | -    | v                     | +/-                        |
| Inositol               | +                     | -    | -                     | +/-                        |
| Manitol                | +                     | -    | -                     | +/-                        |
| Sorbitol               | +                     | -    | -                     | +/-                        |
| Benzoate               | -                     | +    | +                     | -                          |
| D- Tartrate            | -                     | +    | +                     | -                          |

\*=According to Kreigh and Holt 1984 (Bergey's manual) and Long *et al.* (2003);  
 + = Growth positive; - = negative; d+= delay positive; v= variable reaction;  
 NA= Not available
